# Supplementary material
Source: PubMed Central journal article supplement (PMC1954883)
Supplement: gut_2006.097543_1.pdf [file gut_2006.097543_1.pdf]

Data for fig 1

| Age Range                                                                                             | <=30    | 31-40    | 41-50    | 51-60    | 61-70    | 71-80    | >80      |
|-------------------------------------------------------------------------------------------------------|---------|----------|----------|----------|----------|----------|----------|
| Percentage of patients receiving >5mg midazolam as part of first recorded procedure                   | 48.4375 | 44.59459 | 39.77011 | 37.36559 | 27.06767 | 21.14726 | 14.94253 |
| Percentage of patients receiving reversal agent during or immediately after first recorded procedure. | 6.25    | 6.418919 | 7.816092 | 4.83871  | 6.874329 | 9.160959 | 9.067688 |

Data for fig 2

|                                                                                                                                                       | biliary ES | BDS<br>Extraction | BD<br>stent/drain | BiliaryCytology | BiliaryDilatation | PancreaticRx |      |
|-------------------------------------------------------------------------------------------------------------------------------------------------------|------------|-------------------|-------------------|-----------------|-------------------|--------------|------|
| Intervention intended <i>but not</i> completed                                                                                                        |            | 8                 | 15                | 9.2             | 2                 | 0.39         | 0.47 |
| Intervention intended <i>and</i> completed (i.e. complete stone clearance, stent crosses stricture, sphincterotomy facilitates any further procedure) | 38.8       | 24.9              | 21.4              | 4.9             | 1.6               | 1.23         |      |

Data for Fig 3

|                                                                                  | I<br>(n=1951) | II<br>(n=1859) | III<br>(n=477) | IV<br>(n=95) | V<br>(n=13) |
|----------------------------------------------------------------------------------|---------------|----------------|----------------|--------------|-------------|
| Percentage of patients per ASA score dying within 30 days of first recorded ERCP | 0.410046      | 3.066165       | 6.289308       | 15.78947     | 61.53846    |
