# Supplementary material
Source: PubMed Central journal article supplement (PMC1954883)
Supplement: gut_2006.097543_2.pdf [file gut_2006.097543_2.pdf]

## Published Abstracts

Williams EJ and the Steering Committee, BSG Audit of ERCP. Efficacy and safety of pre-cut papillotomy; results of a very large-scale survey of endoscopic retrograde cholangio-pancreatography (ERCP). *Endoscopy* 2005; 37 (Suppl. 1): A280

Williams EJ and the Steering Committee, BSG Audit of ERCP, British Society of Gastroenterology. "Scoping Our (ERCP) Practice"-The gap between current practice and recommendations from NCEPOD. *Gut* 2005 54 (supp. II): A11, 038 (abstract)

Williams EJ and the Steering Committee, BSG Audit of ERCP, British Society of Gastroenterology. Experience and Aspirations of ERCP Trainees in England. *Gut* 2005 54 (supp. II): A72, 276 (abstract)

Williams EJ and the Steering Committee, BSG Audit of ERCP, British Society of Gastroenterology. "Consent practice for ERCP- Is adherence to BSG guidelines associated with a reduced experience of complaints pertaining to complications?" *Gut* 2005 54 (supp. II) A73, 278 (abstract)

## Abstracts in press

Williams EJ and the Steering Committee, BSG Audit of ERCP, British Society of Gastroenterology Successful Cannulation at ERCP- Are we as good at it as we think we are? Results of a large scale survey of endoscopic retrograde cholangio-pancreatography. *Accepted for presentation; BSG 2006*

Williams EJ and the Steering Committee, BSG Audit of ERCP, British Society of Gastroenterology. Risk factors for post ERCP complication : Results of a large scale prospective multi-centre study. *Accepted for presentation; BSG 2006*

Williams EJ and the Steering Committee, BSG Audit of ERCP, British Society of Gastroenterology. Self reported experiences of 2059 patients undergoing ERCP; results of a multi-centre survey in 5 English regions. *Accepted for presentation; BSG 2006*

Williams EJ and the Steering Committee, BSG Audit of ERCP, British Society of Gastroenterology. Diagnosis and management of suspected common bile duct stones in patients fit for cholecystectomy – a survey of 5 UK regions. *Accepted for presentation; BSG 2006*

Defining the difficult ERCP. Performance of the ASGE (modified Schutz) scoring system in a prospectively studied cohort of 5264 procedures.

Williams EJ, and the Steering Committee, BSG Audit of ERCP. Audit and Manpower Office, British Society of Gastroenterology, 3 St Andrews Place, London, UK – *accepted for presentation; AGA 2006*

You're Never too old? a prospective analysis of ERCP performed in patients age 90 years or older;

Williams EJ, and the Steering Committee, BSG Audit of ERCP. Audit and Manpower Office, British Society of Gastroenterology, 3 St Andrews Place, London, UK – *accepted for presentation; AGA 2006*
