# Supplementary material
Source: PubMed Central journal article supplement (PMC1954883)
Supplement: gut_2006.097543_3.pdf [file gut_2006.097543_3.pdf]

## BSG survey of ERCP facilities and services

**To be completed by senior nurse or consultant responsible for ERCP arrangements  
(only one form per unit please)**

Date of completion of questionnaire

|   |   |   |   |   |   |
|---|---|---|---|---|---|
|   |   |   |   |   |   |
| d | d | m | m | y | y |

Name of hospital \_\_\_\_\_

code:

|  |  |  |  |
|--|--|--|--|
|  |  |  |  |
|--|--|--|--|

Post Code:

|  |  |  |  |  |  |
|--|--|--|--|--|--|
|  |  |  |  |  |  |
|--|--|--|--|--|--|

*Insert number*

Type:

University - 1

DGH - 2

Other - 3

Source of referrals:

own hospital and district only - 1  
outside region - 3

other hospitals in region - 2

Size of catchment area (for own district)

|  |  |  |
|--|--|--|
|  |  |  |
|--|--|--|

000

Size of catchment area (for other referrals)

|  |  |  |  |
|--|--|--|--|
|  |  |  |  |
|--|--|--|--|

000

Organisation

Number of gastroenterologists (consultants/physician with interest/staff grades only)

|  |  |
|--|--|
|  |  |
|--|--|

Number of GI surgeons in your hospital (consultants/staff grades only)

|  |  |
|--|--|
|  |  |
|--|--|

Number of GI radiologists in your hospital (consultant/staff grades only)

|  |  |
|--|--|
|  |  |
|--|--|

Do these groups meet regularly to discuss ERCP cases: Yes - 1 No - 2

never - 0      quarterly - 1      monthly - 2      weekly - 3      ad-hoc - 4

What radiologic facilities are available at your institution, for each please specify whether patients usually have these before ERCP and the approximate waiting time

| Procedure         | Available at your hospital |   | Usual (>90%) before ERCP |   | Waiting time (days) |  |
|-------------------|----------------------------|---|--------------------------|---|---------------------|--|
|                   | Y                          | N | Y                        | N |                     |  |
| Ultrasound        |                            |   |                          |   |                     |  |
| CT (conventional) |                            |   |                          |   |                     |  |
| CT (spiral)       |                            |   |                          |   |                     |  |
| MRCP              |                            |   |                          |   |                     |  |
| EUS               |                            |   |                          |   |                     |  |
| PTC               |                            |   |                          |   |                     |  |
| IntraOpCholangio  |                            |   |                          |   |                     |  |

**Where is ERCP performed?**

endoscopy suite - 1                      X-ray dept - 2

surgical theatre - 3 (specify whether main, day centre, recovery etc).....

other - 4 (if more than one location indicate proportions in each) .....

Is this within or adjacent to the general endoscopy environment      Yes - 1      No - 2     

If not, is the room more or less permanently set up for ERCP      Yes - 1      No - 2     

How many duodenoscopes does the unit have?

**Numbers**

video

|  |  |
|--|--|
|  |  |
|--|--|

fibre optic

|  |  |
|--|--|
|  |  |
|--|--|

diagnostic only (2mm channel)

|  |  |
|--|--|
|  |  |
|--|--|

therapeutic only (>2.8mm channel)

|  |  |
|--|--|
|  |  |
|--|--|

Number of ERCPs (total) in year 2000

|  |  |  |
|--|--|--|
|  |  |  |
|--|--|--|

number planned as day cases (from home)

|  |  |  |
|--|--|--|
|  |  |  |
|--|--|--|

number of inpatients (own hospital)

|  |  |  |
|--|--|--|
|  |  |  |
|--|--|--|

number directly from other institutions

|  |  |  |
|--|--|--|
|  |  |  |
|--|--|--|

how many lists per week usually?

|  |  |
|--|--|
|  |  |
|--|--|

how many endoscopists do ERCP (exclude trainees)?

|  |  |
|--|--|
|  |  |
|--|--|

how many trainees involved in ERCP each week?

|  |  |
|--|--|
|  |  |
|--|--|

what is the usual waiting time for ERCP (>75% of time)

for elective patients

|  |  |  |
|--|--|--|
|  |  |  |
|--|--|--|

days

for jaundiced patients

|  |  |  |
|--|--|--|
|  |  |  |
|--|--|--|

days

is out of hours emergency service usually available?      Yes - 1      No - 2

Do you take unselected referrals (do everyone who is sent to you)      Yes - 1      No - 2     

If not, who vets them: 1-Cons; 2-SpR; 3-Nurse; 4- Sec; 5- Other (specify) .....

CONSENT

Does the unit have a written patient consent policy?

Yes - 1    No - 2

% of patients that have been "consented" before arrival in unit

|  |  |   |
|--|--|---|
|  |  | % |
|--|--|---|

% of patients "consented" in unit or vicinity (*if both give proportions*)

|  |  |   |
|--|--|---|
|  |  | % |
|--|--|---|

Do you give written information to patients before the procedure?    Yes - 1    No - 2

If yes - how long beforehand is it given to patients:

>1 week before - 1, >1 day before - 2, on day of procedure - 3

Please tick whether the written information mentions the following complication and indicate the specific complication % rate if mentioned (*if not mentioned leave blank*)

|                                 | <i>Tick</i>              | <i>give %</i>                                                                                                                                                |  | <i>Tick</i> | <i>give %</i> |                          |                                                                                                                                                              |  |  |
|---------------------------------|--------------------------|--------------------------------------------------------------------------------------------------------------------------------------------------------------|--|-------------|---------------|--------------------------|--------------------------------------------------------------------------------------------------------------------------------------------------------------|--|--|
| cardiorespiratory complications | <input type="checkbox"/> | <table border="1" style="display: inline-table;"><tr><td style="width: 20px; height: 20px;"></td><td style="width: 20px; height: 20px;"></td></tr></table> % |  |             | pancreatitis  | <input type="checkbox"/> | <table border="1" style="display: inline-table;"><tr><td style="width: 20px; height: 20px;"></td><td style="width: 20px; height: 20px;"></td></tr></table> % |  |  |
|                                 |                          |                                                                                                                                                              |  |             |               |                          |                                                                                                                                                              |  |  |
|                                 |                          |                                                                                                                                                              |  |             |               |                          |                                                                                                                                                              |  |  |
| cholangitis                     | <input type="checkbox"/> | <table border="1" style="display: inline-table;"><tr><td style="width: 20px; height: 20px;"></td><td style="width: 20px; height: 20px;"></td></tr></table> % |  |             | haemorrhage   | <input type="checkbox"/> | <table border="1" style="display: inline-table;"><tr><td style="width: 20px; height: 20px;"></td><td style="width: 20px; height: 20px;"></td></tr></table> % |  |  |
|                                 |                          |                                                                                                                                                              |  |             |               |                          |                                                                                                                                                              |  |  |
|                                 |                          |                                                                                                                                                              |  |             |               |                          |                                                                                                                                                              |  |  |
| perforation                     | <input type="checkbox"/> | <table border="1" style="display: inline-table;"><tr><td style="width: 20px; height: 20px;"></td><td style="width: 20px; height: 20px;"></td></tr></table> % |  |             | mortality     | <input type="checkbox"/> | <table border="1" style="display: inline-table;"><tr><td style="width: 20px; height: 20px;"></td><td style="width: 20px; height: 20px;"></td></tr></table> % |  |  |
|                                 |                          |                                                                                                                                                              |  |             |               |                          |                                                                                                                                                              |  |  |
|                                 |                          |                                                                                                                                                              |  |             |               |                          |                                                                                                                                                              |  |  |

Who usually (>75% time) obtains consent from the patients?

endoscopist performing procedure - 1    other doctor in unit/ward/OPD - 4  
 doctor assisting procedure - 2    other nurse in unit/ward/OPD - 5  
 nurse assisting procedure - 3

How long beforehand is consent obtained? (>75% time)

>1 week before - 1, >1 day before - 2, on day of procedure - 3

Does the person obtaining consent usually (>50% time) give information about complications?  
 And indicate complication rate likely to be mentioned (*leave blank if not mentioned or not known*)

|                                 | <i>Tick</i>              | <i>give %</i>                                                                                                                                                |  | <i>Tick</i> | <i>give %</i> |                          |                                                                                                                                                              |  |  |
|---------------------------------|--------------------------|--------------------------------------------------------------------------------------------------------------------------------------------------------------|--|-------------|---------------|--------------------------|--------------------------------------------------------------------------------------------------------------------------------------------------------------|--|--|
| cardiorespiratory complications | <input type="checkbox"/> | <table border="1" style="display: inline-table;"><tr><td style="width: 20px; height: 20px;"></td><td style="width: 20px; height: 20px;"></td></tr></table> % |  |             | pancreatitis  | <input type="checkbox"/> | <table border="1" style="display: inline-table;"><tr><td style="width: 20px; height: 20px;"></td><td style="width: 20px; height: 20px;"></td></tr></table> % |  |  |
|                                 |                          |                                                                                                                                                              |  |             |               |                          |                                                                                                                                                              |  |  |
|                                 |                          |                                                                                                                                                              |  |             |               |                          |                                                                                                                                                              |  |  |
| cholangitis                     | <input type="checkbox"/> | <table border="1" style="display: inline-table;"><tr><td style="width: 20px; height: 20px;"></td><td style="width: 20px; height: 20px;"></td></tr></table> % |  |             | haemorrhage   | <input type="checkbox"/> | <table border="1" style="display: inline-table;"><tr><td style="width: 20px; height: 20px;"></td><td style="width: 20px; height: 20px;"></td></tr></table> % |  |  |
|                                 |                          |                                                                                                                                                              |  |             |               |                          |                                                                                                                                                              |  |  |
|                                 |                          |                                                                                                                                                              |  |             |               |                          |                                                                                                                                                              |  |  |
| perforation                     | <input type="checkbox"/> | <table border="1" style="display: inline-table;"><tr><td style="width: 20px; height: 20px;"></td><td style="width: 20px; height: 20px;"></td></tr></table> % |  |             | mortality     | <input type="checkbox"/> | <table border="1" style="display: inline-table;"><tr><td style="width: 20px; height: 20px;"></td><td style="width: 20px; height: 20px;"></td></tr></table> % |  |  |
|                                 |                          |                                                                                                                                                              |  |             |               |                          |                                                                                                                                                              |  |  |
|                                 |                          |                                                                                                                                                              |  |             |               |                          |                                                                                                                                                              |  |  |

PATIENT preparation

Does the unit have a written patient preparation policy? Yes - 1 No - 2

If yes, which of the following apply: - **Please TICK in box:**

|                                    |         |                          |         |                          |                    |                          |
|------------------------------------|---------|--------------------------|---------|--------------------------|--------------------|--------------------------|
| patient fasting before procedure   | 4 hours | <input type="checkbox"/> | 8 hours | <input type="checkbox"/> | 12 hours           | <input type="checkbox"/> |
| patients always have i/v fluids    | Yes     | <input type="checkbox"/> | No      | <input type="checkbox"/> | if needed          | <input type="checkbox"/> |
| do you have a policy for warfarin? | Yes     | <input type="checkbox"/> | No      | <input type="checkbox"/> | convert to heparin | <input type="checkbox"/> |
| do you have a policy for aspirin?  | Yes     | <input type="checkbox"/> | No      | <input type="checkbox"/> |                    |                          |
| do you routinely use antibiotics?  | Yes     | <input type="checkbox"/> | No      | <input type="checkbox"/> |                    |                          |

**TICK** which of the following are performed before ERCP:

|                              |                                           |                                   |                                        |
|------------------------------|-------------------------------------------|-----------------------------------|----------------------------------------|
| FBC <input type="checkbox"/> | Prothrombin time <input type="checkbox"/> | LFTs <input type="checkbox"/>     | Group & Save <input type="checkbox"/>  |
| At what interval:            | <10 days <input type="checkbox"/>         | <30 days <input type="checkbox"/> | <180 days FBC <input type="checkbox"/> |

SEDATION

Does the unit have a policy for sedation? Yes - 1 No - 2 Don't know - 3

Usual sedation used:

|                      | <i>Tick</i>              | <i>Dose</i>                                  |              | <i>Tick</i>              | <i>Dose</i>                                  |  |
|----------------------|--------------------------|----------------------------------------------|--------------|--------------------------|----------------------------------------------|--|
| midazolam            | <input type="checkbox"/> | <input type="text"/> <input type="text"/> mg | fentanyl     | <input type="checkbox"/> | <input type="text"/> <input type="text"/> mg |  |
| diazepam             | <input type="checkbox"/> | <input type="text"/> <input type="text"/> mg | other opiate | <input type="checkbox"/> | <input type="text"/> <input type="text"/> mg |  |
| other benzodiazepine | <input type="checkbox"/> | <input type="text"/> <input type="text"/> mg | propofol     | <input type="checkbox"/> | <input type="text"/> <input type="text"/> mg |  |
| pethidine            | <input type="checkbox"/> | <input type="text"/> <input type="text"/> mg | Other        | <input type="checkbox"/> | Specify:.....                                |  |

Who administers sedation?

|                            |                                                     |                          |
|----------------------------|-----------------------------------------------------|--------------------------|
| anaesthetist - 1           | doctor assisting procedure - 4                      | <input type="checkbox"/> |
| anaesthetic nurse - 2      | endoscopy nurse - 5                                 |                          |
| doctor doing procedure - 3 | other - 6 (state) .....                             |                          |
|                            | (if more than one, specify approximate proportions) |                          |

Is ERCP ever performed under GA? Yes - 1 No - 2 Don't know - 3

How many times in past 12 months?  <10 times  11-50  >50 times

If yes, is it done in the usual area -1 or a different area 2: (state).....

| Does the unit have a policy for oxygenation: | Tick all that apply: | Y | N | DK |
|----------------------------------------------|----------------------|---|---|----|
|                                              | before procedure     |   |   |    |
|                                              | during procedure     |   |   |    |
|                                              | following procedure  |   |   |    |
| Is Pulse oximetry used?                      |                      |   |   |    |
| Is Automated BP monitor used                 |                      |   |   |    |
| Who usually (>75% of time) injects contrast? | endoscopist          |   |   |    |
|                                              | assisting nurse      |   |   |    |
|                                              | assisting doctor     |   |   |    |

What Contrast Agents do you use? .....

RESUSCITATION

Where is the nearest resuscitation trolley?

in the room where ERCP performed - 1      in an adjacent room or corridor area - 2  
in an adjacent department - 3

Does the trolley include a defibrillator?      Yes - 1      No - 2

Is the resuscitation trolley regularly checked?

Yes - 1 by whom (grade) .....      No - 2      Don't know - 3

Does the unit have a policy regarding training of staff in ALS?      Yes - 1      No - 2

If yes, how often are refresher/rehearsal courses attended: every 6, 12, 24, 36 or 60 months?

   
months

Where do patients recover following ERCP?

1- adjacent room/ward area; 2- adjacent department; 3- back on main ward; 4-other (state)

**Thank you very much: please return this form to the co-ordinator in your Region**
