# Supplementary material
Source: PubMed Central journal article supplement (PMC1954883)
Supplement: gut_2006.097543_4.pdf [file gut_2006.097543_4.pdf]

# The BSG Audit On Availability and Quality of Endoscopic Retrograde Cholangio-Pancreatography.

## Endoscopists Questionnaire: For Attention of All Individuals Performing ERCP

Dear Colleague

This questionnaire is addressed to all individuals who perform ERCP. This includes doctors who perform supervised ERCPs as part of their training.

The results will form part of the BSG's confidential audit on the availability and quality of ERCP.

NHS and private hospitals in your region are participating.

Your co-operation is greatly appreciated.

### Instructions

1. **Retain this instruction sheet and the following page.** Keep a record of your endoscopist code – it is unique to you and will be required for later questionnaires.

YOUR ENDOSCOPIST CODE IS

2. Answer all questions unless you are directed to skip them ie **Go To ...**

- 3 Use black pen

- 4 To answer a question place a cross in one box only.

If a question is labelled multiple response you may cross as many boxes as appropriate.

Where a number or text is required print your response, keeping within the squares.

You do not need to prefix numbers with zero ie answer 3 rather than 003.

- 5 if you make a mistake block the box out entirely

7 if you have any problems contact: Earl Williams, Research Fellow, Dept of Clinical Information, 4<sup>th</sup> Floor Linda McCartney Building, Royal Liverpool University Hospital, Prescott St, L7 8XP. Tel 0151 7063794, Fax 0151 7062313 email Earl.Williams@rlbuh-tr.nwest.nhs.uk

### 8. Complications - Definitions for questionnaire (Cotton, Lehman et al. 1991), (Cotton 1994)

| Complication                                                                     | Mild                                                                                                      | Moderate                                                                                            | Severe                                                                                                                          | Fatal            |
|----------------------------------------------------------------------------------|-----------------------------------------------------------------------------------------------------------|-----------------------------------------------------------------------------------------------------|---------------------------------------------------------------------------------------------------------------------------------|------------------|
| Bleeding                                                                         | Clinical (not just endoscopic) evidence of bleeding; HB drop <3g; no transfusion                          | Transfusion (4U or less), no angiographic or surgical intervention                                  | Transfusion (5U or more) or intervention (angiographic or surgical)                                                             | Results in death |
| Perforation                                                                      | Possible or slight leak of contrast; treated by fluids & suction for 3 days or less                       | Any definite perforation treated medically for 4-10 days                                            | Hospitalisation for >10 days or any intervention (percutaneous or surgical).                                                    | Results in death |
| Pancreatitis<br>(Abdo pain + amylase >3N after 24 hrs)                           | requiring admission or prolongation of planned admission beyond 48 hrs                                    | requiring of 4-10 days hospitalisation                                                              | admission > 10 days; haemorrhagic pancreatitis; pseudocyst; intervention required                                               | Results in death |
| Infection<br>(cholangitis)                                                       | >38 °C 24-48 hrs                                                                                          | Febrile or septic illness requiring >3 days hospitalisation or endoscopic/percutaneous intervention | Septic shock or surgery                                                                                                         | Results in death |
| Miscellaneous<br>(include symptomatic IHD, aspiration pneumonia, drug reactions) | Onset of relevant symptoms within 3 days of ERCP. Requires 1-3 days hospitalisation/ prolongation of stay | Onset of relevant symptoms within 3 days of ERCP. Requires 4-10 days hospitalisation                | Onset of relevant symptom within 3 days of ERCP. Requires >10 days hospitalisation or ITU or surgical/radiological intervention | Results in death |

# The BSG Audit On Availability and Quality of Endoscopic Retrograde Cholangio-Pancreatography

**PLEASE RETAIN FOR FUTURE INFORMATION**

## Hospital Codes for Your Region:

| HospitalID | HospitalName                        |
|------------|-------------------------------------|
| L01        | University Hospital Aintree         |
| L02        | Arrowe Park Hospital                |
| L03        | Countess of Chester Hospital        |
| L04        | Fairfield Hospital                  |
| L05        | Macclesfield General Hospital       |
| L06        | Royal Liverpool University Hospital |
| L07        | Southport District General hospital |
| L08        | Warrington Hospital                 |
| L09        | Whiston Hospital                    |
| L10        | Leighton Hospital                   |

EXAMPLE FOR MERSEYSIDE

(FOR OTHER REGIONS SEE SEPARATE ATTACHMENT)

## BSG Audit of ERCP Services

To be completed once by each endoscopist

Your Endoscopist Code

The Hospitals Code

Date of completion of questionnaire

/  / 200

YOUR INITIALS

### 1. Indicate status that best describes you

- Gastroenterologist
- GI Surgeon
- Radiologist
- Physician (other)
- Surgeon (other)

### 2. Specify current grade

- SpR **GO TO 3**
- Consultant **GO TO 7**
- Associate Specialist
- Staff Grade **GO TO 8**
- SHO
- Other

### 3. As a consultant I would: :

- prefer a teaching hospital post
- prefer a district general hospital post
- have no preference if given a choice

### 4. As a consultant I intend to

- Definitely perform ERCPs
- Probably perform ERCPs
- Possibly perform ERCPs
- Not perform ERCPs

5. With regards to the statement "I require ERCP training to ensure future career opportunities are not denied to me" do you :

- Strongly agree
- Agree
- Neither agree nor disagree
- Disagree
- Strongly disagree

6. I would rate ERCP training in my region as:

- Excellent
- Good
- Adequate
- Inadequate

**NOW GO TO 8**

7. Do you perform ERCP in the private sector  No  Yes

8. specify years in current grade (if <1 enter 0)

9. Year of qualification

10. Year of first ERCP

11. Indicate if you are a member of the following (multiple response):

- BSG  ASGE
- AGA  ESGE
- EGA

### 12. Do You

- offer a service to proceed directly to ERCP on colleagues request
- vet referrals from other consultants
- a combination of the above
- not place patients on list personally

**BSG Audit of ERCP Services**  
**To be completed once by each endoscopist**

**13. How many OGDs did you perform before commencing ERCP training**

- <100       300-500  
 100-200     500-800  
 200-300     800 or more

**14. How many colonoscopies did you perform before commencing ERCP training**

- <100       300-500  
 100-200     500-800  
 200-300     800 or more

**15. How many ERCPs did you observe before commencing (supervised) ERCPs**

- None       5-10  
 <5       10 or more

**16. During your career how many ERCPs have you performed which are supervised (ie a senior colleague in room to advise/assist)**

- <50       150-200  
 50-100     200-300  
 100-150    300 or more

**17. During your career how many ERCPs have you performed which are independant (ie no supervisor in room)**

- <100       300-500  
 100-200     500-800  
 200-300     800 or more

**18. Total no. of supervised ERCPs in last 12 months:**

- None       100-150  
 <50       150-200  
 50-100     200 or more

**19. Total number of independant ERCPs in last 12 months**

- None       100-150  
 <50       150-200  
 50-100     200 or more

**20. Total number of therapeutic biliary cases (ie. biliary duct sphincterotomies, stents and stone removal) performed by you in the last 12 months**

- None       50-100  
 <25       100-150  
 25-50     150 or more

**21. Total number of therapeutic pancreatic cases (ie. pancreatic duct sphincterotomy, stone removal and stenting, pseudocyst drainage) performed by you in the last 12 months**

- None       50-100  
 <25       100-150  
 25-50     150 or more

**CONSENT PRACTICE**

**22. Do you give written information to the patients before the procedure**       Yes  
 No **GO TO Q 25**

**23. if yes when does the patient usually (>50%) receive written information**

- On day of procedure  
 within 7 days  
 > 1 week before

**ANSWER THE FOLLOWING IN  
RELATION TO WHEN YOU DO THE ERCP**

**CONSENT PRACTICE**

24. Indicate which of the following complications are mentioned in the written information. Give the percentage risk of the complication occurring if this is also quoted: (multiple response)

- |                                                      |               |                      |                      |
|------------------------------------------------------|---------------|----------------------|----------------------|
| <input type="checkbox"/> Cardiorespiratory mentioned | % risk quoted | <input type="text"/> | <input type="text"/> |
| <input type="checkbox"/> Pancreatitis mentioned      | % risk quoted | <input type="text"/> | <input type="text"/> |
| <input type="checkbox"/> Cholangitis mentioned       | % risk quoted | <input type="text"/> | <input type="text"/> |
| <input type="checkbox"/> Haemorrhage mentioned       | % risk quoted | <input type="text"/> | <input type="text"/> |
| <input type="checkbox"/> Perforation mentioned       | % risk quoted | <input type="text"/> | <input type="text"/> |
| <input type="checkbox"/> Mortality mentioned         | % risk quoted | <input type="text"/> | <input type="text"/> |

25. Who normally (>50% of time) obtains verbal consent from the patient

- Endoscopist performing procedure
- Doctor assisting procedure
- Nurse assisting procedure
- Other doctor in unit or on ward
- Other nurse in unit or on ward

26. When is verbal consent usually (>50% of the time) obtained

- On day of procedure
- within 7 days
- > 1 week before

27. Which of the following complications are usually (>50% of time) mentioned by the person who normally obtains verbal consent.

Give the percentage risk of the complication occurring, if this is also quoted (multiple response)

- |                                                      |               |                      |                      |
|------------------------------------------------------|---------------|----------------------|----------------------|
| <input type="checkbox"/> Cardiorespiratory mentioned | % risk quoted | <input type="text"/> | <input type="text"/> |
| <input type="checkbox"/> Pancreatitis mentioned      | % risk quoted | <input type="text"/> | <input type="text"/> |
| <input type="checkbox"/> Cholangitis mentioned       | % risk quoted | <input type="text"/> | <input type="text"/> |
| <input type="checkbox"/> Haemorrhage mentioned       | % risk quoted | <input type="text"/> | <input type="text"/> |
| <input type="checkbox"/> Perforation mentioned       | % risk quoted | <input type="text"/> | <input type="text"/> |
| <input type="checkbox"/> Mortality mentioned         | % risk quoted | <input type="text"/> | <input type="text"/> |

28. Are alternative procedures (eg surgical bypass) discussed with patients

- Always    Usually    Occasionally    Never

29. Are patients made aware if more than one doctor (eg a trainee) is participating in the list

- Always    Usually    Occasionally    Never

**MONITORING**

30. During the procedure does a specific nurse monitor the patient?

- Always    Usually    Occasionally    Never

31. Do you use pulse oximetry during ERCP

- Always
- Never **GO TO 33**
- Selected cases only, Specify (multiple response)
- pre-existing cardiorespiratory disease
- concerned during procedure
- other

32. If oximetry is used at what saturation would you consider further measures need to be taken to ensure satisfactory oxygenation  %

33. Do you use automated BP evaluation during ERCP

- Always
- Never
- selected cases only, specify (multiple response);
- pre-existing cardiorespiratory disease
- if concerned during procedures
- Other

34. Do you check blood glucose at the time of the procedure

- Always
- Never
- selected cases only, Specify (multiple response);
- Diabetic patient
- concerned during procedure
- Other

**ANSWER THE FOLLOWING IN  
RELATION TO WHEN YOU DO THE ERCP**

**SEDATION**

35. Do you use GA for your ERCPs

- Never       50-75%
- Rarely       >75%
- <25%       Always **GO TO 40**
- 25-50%

36. Do you use intravenous sedation for your patients

- Never **GO TO 40**       50-75%
- Rarely       >75%
- <25%       Always
- 25-50%

37. Indicate which sedative/analgesic or combination of sedative/analgesic is your preferred choice and the average dose(s) administered by end of procedure (multiple response)

| Tick Box                           | Enter dose                                                         | Tick Box                                                                                                                                                                                                                                                                                                                                                               | Enter dose                                                                |
|------------------------------------|--------------------------------------------------------------------|------------------------------------------------------------------------------------------------------------------------------------------------------------------------------------------------------------------------------------------------------------------------------------------------------------------------------------------------------------------------|---------------------------------------------------------------------------|
| <input type="checkbox"/> Midazolam | <input type="text"/> <input type="text"/> mg                       | <input type="checkbox"/> Nalbuphine                                                                                                                                                                                                                                                                                                                                    | <input type="text"/> <input type="text"/> mg                              |
| <input type="checkbox"/> Diazepam  | <input type="text"/> <input type="text"/> mg                       | <input type="checkbox"/> Propofol                                                                                                                                                                                                                                                                                                                                      | <input type="text"/> <input type="text"/> mg                              |
| <input type="checkbox"/> Pethidine | <input type="text"/> <input type="text"/> <input type="text"/> mg  | <input type="checkbox"/> Other drug                                                                                                                                                                                                                                                                                                                                    | <input type="text"/> <input type="text"/> <input type="text"/> mg/<br>mcg |
| <input type="checkbox"/> Fentanyl  | <input type="text"/> <input type="text"/> <input type="text"/> mcg | specify other drug:<br><input type="text"/> <input type="text"/> |                                                                           |

38. If combination administered do you give

- Opioid first
- Sedative first
- No Set Practice

39. Indicate if you are familiar with the guidelines on sedation produced by the following groups (multiple response)

- Bell GD, McCloy RF, Charlton JE et al, Gut 1991
- Royal College of Surgeons Working Party, 1993
- UK Academy of Medical Royal Colleges Working Party .2001

**INVESTIGATION**

40. What proportion of your ERCPs have the following procedures beforehand.

**Trans Abdominal USS**

- None       50-75%
- rarely       > 75%
- <25%       All
- 25-50%

**Endoscopic US**

- None       50-75%
- Rarely       > 75%
- <25%       All
- 25-50%

**Computerised Tomography**

- None       50-75%
- Rarely       > 75%
- <25%       All
- 25-50%

**Magnetic Resonance Imaging**

- None       50-75%
- Rarely       > 75%
- <25%       All
- 25-50%

**Percutaneous Transhepatic Cholangiography**

- None       50-75%
- Rarely       > 75%
- <25%       All
- 25-50%

**Intra Operative Cholangiography**

- None       50-75%
- Rarely       > 75%
- <25%       All
- 25-50%



**ANSWER THE FOLLOWING IN  
RELATION TO WHEN YOU DO THE ERCP**

**COMPLICATIONS**

**52. Does your unit routinely gather information on complications**

- Yes  
 No **GO TO 55**

**53. If yes is that reported to you**

- At the time     Quarterly  
 Weekly         Less often  
 Monthly

**54. Are complications recorded in a computer database**

- Yes     No

**55. Do you keep a record of your own complications**

- Yes  
 No **GO TO 57**

**56. If yes is this:**

- Only those occurring at the time of the procedure  
 Only of those patients you hear about  
 Following a definite attempt to find out at

- (multiple response)  
24 Hour   
7-Day   
30-Day

**57. To the best of your knowledge how many cases of the following have occurred as a result of your last 100 ERCPs (or total number of ERCPs if <100)**

**(If unknown please leave blank)**

**DEFINITIONS ARE LISTED ON COVER LETTER**

**a. Haemorrhage**

mild      moderate      severe      fatal

**b. Pancreatitis**

mild      moderate      severe      fatal

**c. Perforation**

mild      moderate      severe      fatal

**d. cholangitis**

mild      moderate      severe      fatal

**e. miscellaneous/cardiorespiratory**

mild      moderate      severe      fatal

**THANKYOU FOR YOUR CO-OPERATION:**

**Please return to:**

**Earl Williams, Clinical Information  
4th Floor, Linda McCartney Building,  
Royal Liverpool University Hospital,  
Prescot St,  
Liverpool L7 8XP**

tel. 0151 7063794

fax. 0151 7062313

email [Earl.Williams@rlbuh-tr.nwest.nhs.uk](mailto:Earl.Williams@rlbuh-tr.nwest.nhs.uk)
